# Supplementary material
Source: publisher figshare collection journal article supplement (https://acs.figshare.com/ndownloader/files/5185750)
Supplement: Supplementary file 1 [file 5185750]

*Supporting information for*

# Modulation of the Sensitive Temperature Range of Fluorescent Molecular Thermometers Based on Thermo-Responsive Polymers

Seiichi Uchiyama,<sup>†,‡</sup> Yuriko Matsumura,<sup>†</sup> A. Prasanna de Silva,<sup>‡</sup> Kaoru Iwai<sup>†</sup>

<sup>†</sup>Department of Chemistry, Faculty of Science, Nara Women's University, Kitaouoya-Nishimachi, Nara 630-8506, Japan

<sup>‡</sup>School of Chemistry, Queen's University, Belfast, Northern Ireland, Belfast BT9 5AG, UK

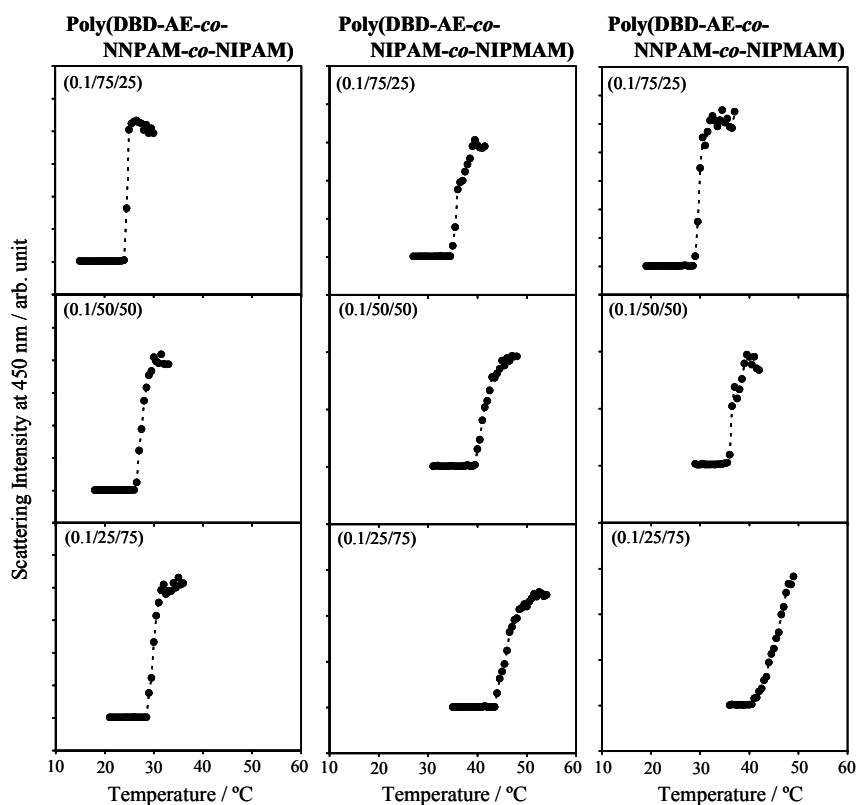

**Figure S1.** Relationships between the temperatures and the scattering intensities of poly(DBD-AE-co-NNPAM-co-NIPAM), poly(DBD-AE-co-NIPAM-co-NIPMAM), and poly(DBD-AE-co-NNPAM-co-NIPMAM). The excitation wavelength was 444 nm.

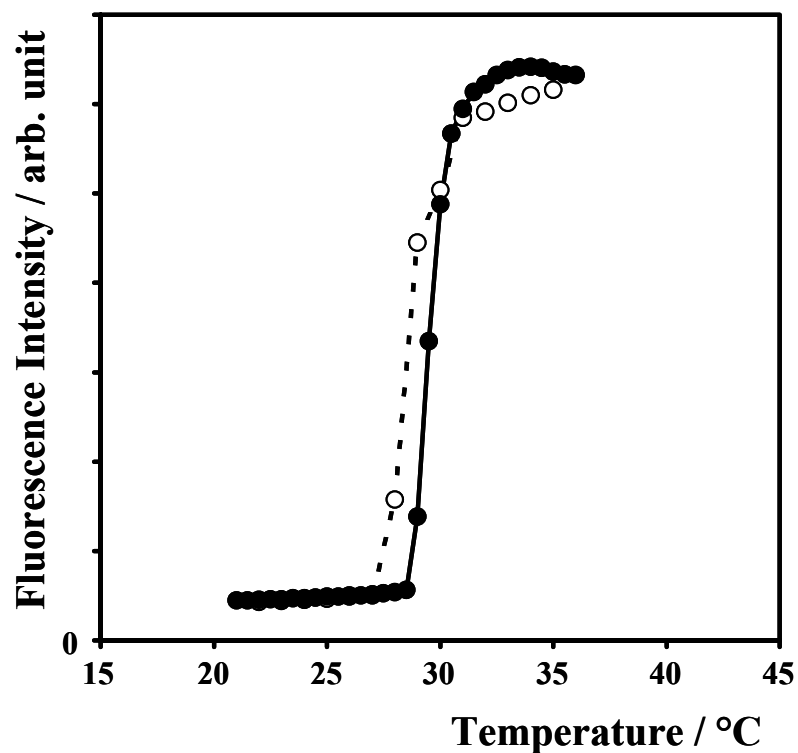

**Figure S2.** Hysteresis of poly(DBD-AE-*co*-NNPAM-*co*-NIPAM) (0.1/25/75) as a representative; relationships between the temperatures and the normalized fluorescence intensities at maximum emission wavelengths with heating (—●—) and cooling (---○---) in aqueous solution (0.01 w/v%). Fluorescence intensities were normalized by using the fluorescence intensity at 26 °C ( $T_{\text{low}}$ ).

**Table S1. Sensitivities and reproducibilities of the developed fluorescent molecular thermometers<sup>a</sup>**

| copolymer                                         | T <sub>low</sub> <sup>b</sup><br>(°C) | T <sub>high</sub> <sup>b</sup><br>(°C) | ΔT <sup>b</sup><br>(°C) | FE <sup>c</sup> | FE/ΔT<br>(°C <sup>-1</sup> ) |
|---------------------------------------------------|---------------------------------------|----------------------------------------|-------------------------|-----------------|------------------------------|
| poly(DBD-AE- <i>co</i> -NNPAM- <i>co</i> -NIPAM)  |                                       |                                        |                         |                 |                              |
| (0.10/75/25)                                      | 22.5                                  | 26.5                                   | 4.0                     | 13.4            | 3.4                          |
| (0.10/50/50)                                      | 26.0                                  | 28.5                                   | 2.5                     | 11.6            | 4.6                          |
| (0.10/25/75)                                      | 28.0                                  | 31.5                                   | 3.5                     | 11.4            | 3.3                          |
| poly(DBD-AE- <i>co</i> -NIPAM- <i>co</i> -NIPMAM) |                                       |                                        |                         |                 |                              |
| (0.10/75/25)                                      | 34.5                                  | 38.5                                   | 4.0                     | 11.6            | 2.9                          |
| (0.10/50/50)                                      | 39.0                                  | 43.5                                   | 4.5                     | 9.29            | 2.1                          |
| (0.10/25/75)                                      | 43.5                                  | 48.0                                   | 4.5                     | 7.39            | 1.6                          |
| poly(DBD-AE- <i>co</i> -NIPAM- <i>co</i> -NIPMAM) |                                       |                                        |                         |                 |                              |
| (0.10/75/25)                                      | 28.0                                  | 33.0                                   | 5.0                     | 14.5            | 2.9                          |
| (0.10/50/50)                                      | 34.0                                  | 39.5                                   | 5.5                     | 10.1            | 1.8                          |
| (0.10/25/75)                                      | 40.0                                  | 46.5                                   | 6.5                     | 8.04            | 1.2                          |
| c.f. poly(DBD-AE- <i>co</i> -NNPAM)               | 19.0                                  | 23.0                                   | 4.0                     | 14.9            | 3.7                          |
| c.f. poly(DBD-AE- <i>co</i> -NIPAM)               | 31.5                                  | 36.0                                   | 4.5                     | 11.4            | 2.5                          |
| c.f. poly(DBD-AE- <i>co</i> -NIPMAM)              | 46.0                                  | 53.5                                   | 7.5                     | 6.75            | 0.90                         |

<sup>a</sup>Resolution of the independent variable of temperature is 0.5 °C. <sup>b</sup>Definitions are described in text. <sup>c</sup>Ratio of the fluorescence intensities at T<sub>high</sub> to that at T<sub>low</sub>.
